# Supplementary material
Source: Springer Nature journal article supplement (https://www.springermedizin.de/resource/supplementary/12931_2013_1390_MOESM6_ESM.pdf/9426154)

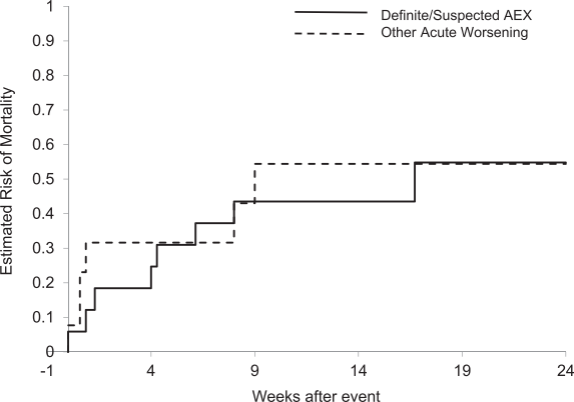

Supplement: MOESM6 [file 9426154]
